# Supplementary material
Source: PubMed Central journal article supplement (PMC3480532)
Supplement: supp_186.6.546_Diamond_ODS.pdf [file supp_186.6.546_Diamond_ODS.pdf]

## Online Data Supplement

### **Title: Variation in *PTX3* is Associated With Primary Graft Dysfunction After Lung Transplantation**

Authors: Joshua M. Diamond<sup>1</sup>, Nuala J. Meyer<sup>1</sup>, Rui Feng<sup>2</sup>, Melanie Rushefski<sup>2,3</sup>, David J. Lederer<sup>4</sup>, Steven M. Kawut<sup>1,2,5</sup>, James C. Lee<sup>1</sup>, Edward Cantu<sup>6</sup>, Rupal Shah<sup>1</sup>, Vibha N. Lama<sup>7</sup>, Sangeeta Bhorade<sup>8</sup>, Maria Crespo<sup>9</sup>, Ejigayehu Demissie<sup>1,2</sup>, Joshua Sonett<sup>10</sup>, Keith Wille<sup>11</sup>, Jonathan Orens<sup>12</sup>, Ann Weinacker<sup>13</sup>, David Weill<sup>13</sup>, Selim Arcasoy<sup>4</sup>, Pali D. Shah<sup>12</sup>, John A. Belperio<sup>14</sup>, David Wilkes<sup>15</sup>, Lorraine B. Ware<sup>16</sup>, Scott M. Palmer<sup>17</sup> and Jason D. Christie<sup>1,2</sup> for the Lung Transplant Outcomes Group

**PGD Grading:** Chest radiographs were independently assessed by two trained physicians with adjudication of conflicts(1). The classification kappa for PGD was 0.95. Chest radiographs were examined immediately after transplant (T0) and at 24, 48, and 72 hours post-transplant with scores reported at each time point (2-7).

**Genotyping Method:** The following SNPs were chosen for genotyping because they identify known coding variants: rs35948036 (synonymous), rs3816527 (nonsynonymous), rs35415718 (nonsynonymous), and rs4478039 (nonsynonymous). Genomic DNA was extracted from buffy coat using the Qiagen Qiaamp 96 blood kit (Qiagen, Valencia, CA). Negative controls were included in all DNA extraction runs. Extracted DNA from PGD and non-PGD subjects were plated together on each 96-well microplate and lab personnel were unaware of the PGD status of each sample. Genotyping of *PTX3* tagging SNPs was performed using two separate platforms:

Platform 1: We used a custom 50K single nucleotide polymorphism (SNP) genotyping array, called the HumanCVD BeadChip™ (manufactured by Illumina, Inc.® (San Diego,CA)) designed to assay SNPs in candidate genes and pathways affecting cardiovascular, pulmonary, inflammatory, and metabolic phenotypes (8). This array was designed in collaboration with the Institute for Translational Medicine and Therapeutics (ITMAT) at the University of Pennsylvania, the Broad Institute, and the National Heart Lung and Blood Institute (NHLBI)-supported Candidate-gene Association Resource (CARE) Consortium. The array was designed to evaluate all non-synonymous coding SNPs with minor allele frequencies (MAF) > 0.01, as well as provide coverage for a number of loci with MAF > 0.02 of potential import to cardiac, pulmonary, and metabolic phenotypes (8). Quality control thresholds for each SNP to be included in the analysis

included genotyping call  $\geq 95\%$ ; test of Hardy-Weinberg equilibrium (HWE) by chi-square testing on the whole population yielding a p value  $\geq 10^{-6}$ ; and MAF  $\geq 0.01$  overall. The following SNPs were genotyped using this platform: rs9289983, rs1456099, rs2120243, rs2305619, rs3816527, rs3845978.

Platform 2: The following SNPs were genotyped using Taqman® (Applied Biosystems, Foster City, CA) rs35415718, rs35948036, rs55757068, rs4478039. The call rate for all SNPs genotyped using Taqman® was  $>95\%$ .

**Measurement of PTX3 Concentration:** Blood samples from all study subjects were collected prior to transplant and at 6 and 24 hours after allograft reperfusion. Samples were centrifuged within 30 minutes and then stored at  $-80^{\circ}\text{C}$  prior to subsequent analysis. The intra-assay coefficient of variation for the ELISA (Alexis Biochemicals, Switzerland) was 5.7% (9).

**Statistical Analysis:** Three of the 10 SNPs genotyped had a MAF $<5\%$  in the transplant population and were not included in the analysis. Haplotypes were inferred using standard expectation maximization algorithms in Haploview (10) and the confidence interval (CI) criteria (11). Each haplotype was tested for association with PGD, adjusting for key clinical covariates and population stratification. Significance was determined using the  $\chi^2$  test.

**Power Calculation:** We had 654 lung transplant recipients for the candidate gene association study. Given a PGD incidence of approximately 29% in this population (7, 9) we calculated that we had 80% power to detect variants with MAF  $\geq 0.05$  with a minimum relative risk (RR) of 1.6, at an alpha level of 0.007. All power calculations

were performed using Power Calculator for Genetic Studies and Power for Genetic Association Analyses (12, 13).

**Results:** The results of the SNP-association study among patients with a pre-operative diagnosis of IPF are presented in Supplementary Table E1.

| rs number  | Minor Allele | Risk Allele | MAF affected | MAF unaffected | OR (95% CI)    | p     | Location    |
|------------|--------------|-------------|--------------|----------------|----------------|-------|-------------|
| rs9289983  | G            | A           | 0.40         | 0.50           | 0.7 (0.5, 1.0) | 0.06  | 5' upstream |
| rs1456099  | A            | T           | 0.42         | 0.52           | 0.7 (0.5, 1.0) | 0.047 | 5' upstream |
| rs2120243  | A            | A           | 0.47         | 0.39           | 1.5 (1.0, 2.2) | 0.04  | 5' upstream |
| rs2305619  | T            | T           | 0.53         | 0.45           | 1.4 (1.0, 2.1) | 0.06  | Intron      |
| rs3816527  | G            | G           | 0.42         | 0.38           | 1.3 (0.9, 1.9) | 0.2   | Coding      |
| rs55757068 | C            | C           | 0.09         | 0.06           | 1.1 (0.5, 2.2) | 0.8   | Intron      |
| rs3845978  | C            | C           | 0.09         | 0.06           | 1.2 (0.6, 2.6) | 0.6   | Intron      |

**Supplemental Table E1.**

Supplemental Figure E1 represents a box plot of PTX3 plasma concentration measured 24 hours post-transplantation stratified by genotype at the rs2120243 locus in 47 European ancestry patients with IPF as a pre-operative diagnosis. Supplemental Figure E2 represents a box plot of pre-transplant PTX3 concentration stratified by genotype at the rs2305619 locus. The p-value reported for both figures is from the nonparametric test for trend. The horizontal line indicates the median concentration and the upper and lower limits of the boxes indicate the interquartile range.

## References:

1. Diamond JM, Kawut SM, Lederer DJ, Ahya VN, Kohl B, Sonett J, Palmer SM, Crespo M, Wille K, Lama VN, et al. Elevated plasma Clara cell secretory protein concentration is associated with high-grade primary graft dysfunction. *Am J Transplant* 2011;11:561-567.
2. Christie JD, Bellamy S, Ware LB, Lederer D, Hadjiliadis D, Lee J, Robinson N, Localio AR, Wille K, Lama V, et al. Construct validity of the definition of primary graft dysfunction after lung transplantation. *J Heart Lung Transplant* 2010;29:1231-1239.
3. Christie JD, Carby M, Bag R, Corris P, Hertz M, Weill D. Report of the ISHLT working group on primary lung graft dysfunction part II: Definition. A consensus statement of the International Society for Heart and Lung Transplantation. *J Heart Lung Transplant* 2005;24:1454-1459.
4. Christie JD, Robinson N, Ware LB, Plotnick M, De Andrade J, Lama V, Milstone A, Orens J, Weinacker A, Demissie E, et al. Association of protein C and type 1 plasminogen activator inhibitor with primary graft dysfunction. *Am J Respir Crit Care Med* 2007;175:69-74.
5. Christie JD, Shah CV, Kawut SM, Mangalmurti N, Lederer DJ, Sonett JR, Ahya VN, Palmer SM, Wille K, Lama V, et al. Plasma levels of receptor for advanced glycation end products, blood transfusion, and risk of primary graft dysfunction. *Am J Respir Crit Care Med* 2009;180:1010-1015.
6. Christie JD, Van Raemdonck D, de Perrot M, Barr M, Keshavjee S, Arcasoy S, Orens J. Report of the ISHLT working group on primary lung graft dysfunction part I: Introduction and methods. *J Heart Lung Transplant* 2005;24:1451-1453.
7. Lederer DJ, Kawut SM, Wickersham N, Winterbottom C, Bhorade S, Palmer SM, Lee J, Diamond JM, Wille KM, Weinacker A, et al. Obesity and primary graft dysfunction after lung transplantation: The lung transplant outcomes group obesity study. *Am J Respir Crit Care Med* 2011;184:1055-1061.
8. Keating BJ, Tischfield S, Murray SS, Bhangale T, Price TS, Glessner JT, Galver L, Barrett JC, Grant SF, Farlow DN, et al. Concept, design and implementation of a cardiovascular gene-centric 50 k SNP array for large-scale genomic association studies. *PLoS One* 2008;3:e3583.
9. Diamond JM, Lederer DJ, Kawut SM, Lee J, Ahya VN, Bellamy S, Palmer SM, Lama VN, Bhorade S, Crespo M, et al. Elevated plasma long pentraxin-3 levels and primary graft dysfunction after lung transplantation for idiopathic pulmonary fibrosis. *Am J Transplant* 2011;11:2517-2522.
10. Barrett JC, Fry B, Maller J, Daly MJ. Haploview: Analysis and visualization of LD and haplotype maps. *Bioinformatics* 2005;21:263-265.
11. Gabriel SB, Schaffner SF, Nguyen H, Moore JM, Roy J, Blumenstiel B, Higgins J, DeFelice M, Lochner A, Faggart M, et al. The structure of haplotype blocks in the human genome. *Science* 2002;296:2225-2229.
12. Menashe I, Rosenberg PS, Chen BE. P-gate: Power calculator for case-control genetic association analyses. *BMC Genet* 2008;9:36.
13. Skol AD, Scott LJ, Abecasis GR, Boehnke M. Joint analysis is more efficient than replication-based analysis for two-stage genome-wide association studies. *Nat Genet* 2006;38:209-213.

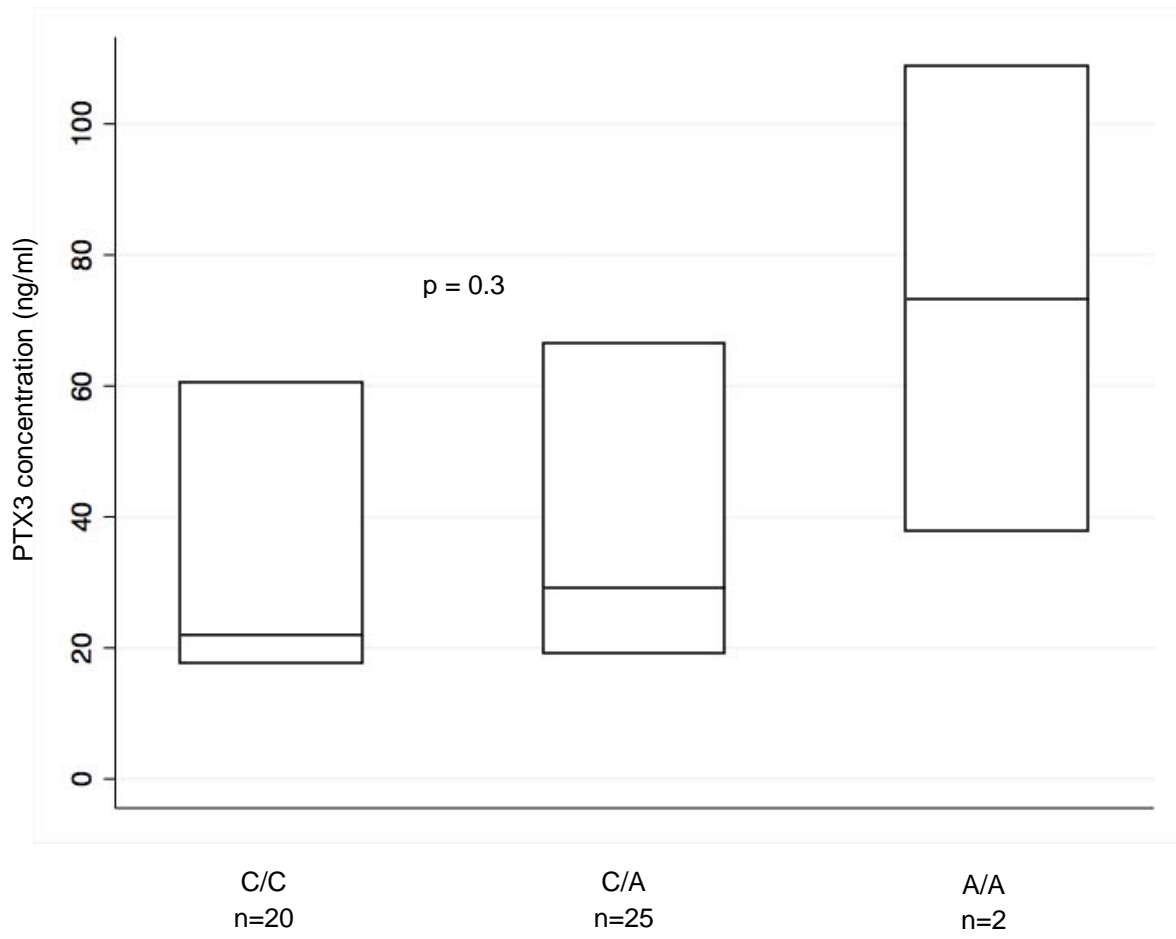

**Supplemental Figure E1.**

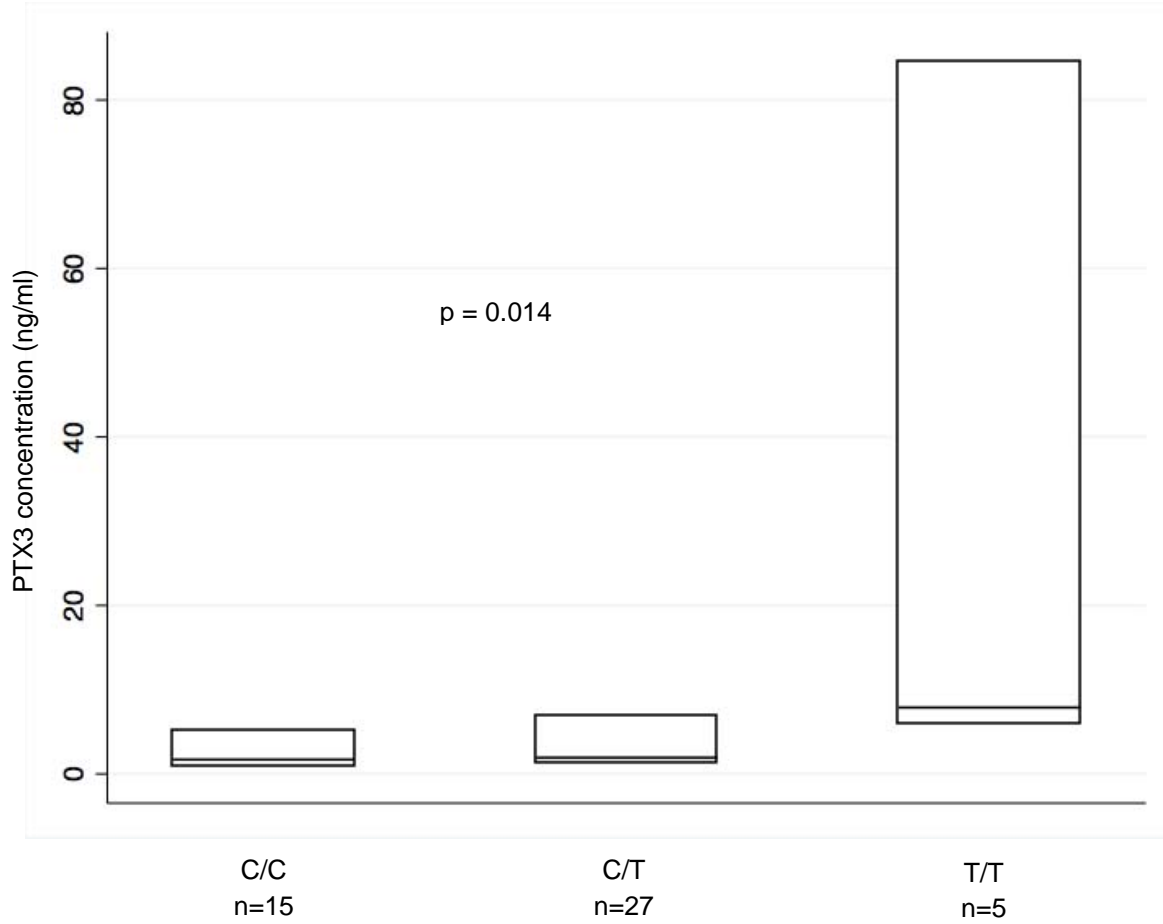

**Supplemental Figure E2.**
